# Supplementary material
Source: ML conference proceedings conference paper supplement (https://proceedings.neurips.cc/paper_files/paper/2016/hash/158fc2ddd52ec2cf54d3c161f2dd6517-Abstract.html)
Supplement: Supplementary file [file 158fc2ddd52ec2cf54d3c161f2dd6517-Supplemental.zip]

# Supplementary material

## A Dataset descriptions

- **NIPS**: co-author graph of authors at the first twelve editions of NIPS, obtained from [17]. For this dataset, as well as the Enzyme dataset below, we have  $A = B$ . The co-author graph comprises  $n_A = n_B = 2,037$  authors represented by bag-of-words vectors of dimension  $d_A = d_B = 13,649$  (words used by authors in their publications). The number of positive samples is  $n_+ = 4,140$ .
- **Enzyme**: metabolic network obtained from [21]. The network comprises  $n_A = n_B = 668$  enzymes represented by three sets of features: a 157-dimensional vector of phylogenetic information, a 145-dimensional vector of gene expression information and a 23-dimensional vector of gene location information. We concatenate the three sets of information to form feature vectors of dimension  $d_A = d_B = 325$ . Original enzyme similarity scores are between 0 and 1. We binarize the scores using 0.95 as threshold. The resulting number of positive samples is  $n_+ = 2,994$ .
- **GD**: human gene-disease association data obtained from [10]. The bipartite graph is comprised of  $n_A = 3,209$  diseases and  $n_B = 12,331$  genes. We represent each disease using a vector of  $d_A = 3,209$  dimensions, whose elements are similarity scores obtained from MimMiner. The study [10] also used bag-of-words vectors describing each disease but we found these to not help improve performance both for baselines and proposed methods. We represent each gene using a vector of  $d_B = 25,275$  features, which are the concatenation of 12,331 similarity scores obtained from HumanNet and 12,944 gene-phenotype associations from 8 other species. See [10] for a detailed description of the features. The number of positive samples is  $n_+ = 3,954$ .
- **Movielens 100K**: recommender system data obtained from [6]. The bipartite graph is comprised of  $n_A = 943$  users and  $n_B = 1,682$  movies. For users, we convert age, gender, occupation and living area (first digit of zipcode) to a binary vector using a one-hot encoding. For movies, we use the release year and genres. The resulting vectors are of dimension  $d_A = 49$  and  $d_B = 29$ , respectively. Original ratings are between 1 and 5. We binarize the ratings using 5 as threshold, resulting in  $n_+ = 21,201$  positive samples.

## B Additional experiments

### B.1 Solver comparison

We also compared AdaGrad, L-BFGS and coordinate descent (CD) on the Enzyme, Gene-Disease (GD) and Movielens 100K datasets. Results are indicated in Figure 2, 3 and 4, respectively.

### B.2 Recommender system experiments

As we explained in Section 5.2, the all-subsets kernel can be a good choice if the number of non-zero elements per sample is small. To verify this assumption, we ran experiments on two recommender system tasks: Movielens 1M and Last.fm. We used the exact same setting as in [4, Section 9.3]. For each rating  $y_i$ , the corresponding  $\mathbf{x}_i$  was set to the concatenation of the one-hot encodings of the user and item indices. We compared the following models:

- FM:  $\hat{y}_i = \langle \mathbf{w}, \mathbf{x}_i \rangle + \sum_{s=1}^k \mathcal{A}^2(\mathbf{p}_s, \mathbf{x}_i)$
- FM-augmented:  $\hat{y}_i = \sum_{s=1}^k \mathcal{A}^2(\mathbf{p}_s, \tilde{\mathbf{x}}_i)$  where  $\tilde{\mathbf{x}}_i^T = [1, \mathbf{x}_i^T]$
- All-subsets:  $\hat{y}_i = \sum_{s=1}^k \mathcal{S}(\mathbf{p}_s, \mathbf{x}_i)$
- Polynomial networks:  $\hat{y}_i = \tilde{\mathbf{x}}_i \mathbf{U} \mathbf{V}^T \tilde{\mathbf{x}}_i$  (c.f. [4] for more details)

Results are indicated in Figure 5. We see that All-subsets performs relatively well on these tasks.

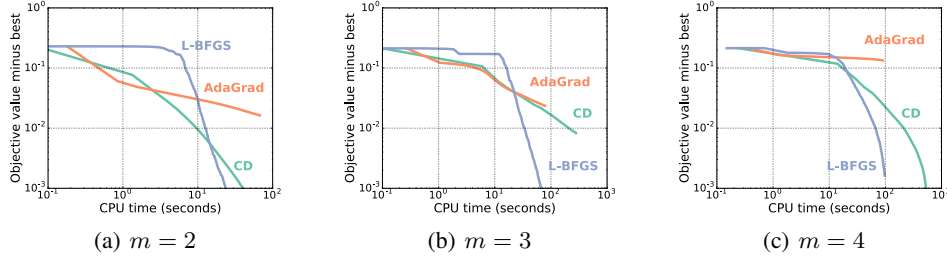

Figure 2: Solver comparison for minimizing (10) on the Enzyme dataset. We set  $\beta$  to the values with best test-set performance, which were  $\beta = 0.1$ ,  $\beta = 0.1$  and  $\beta = 0.01$ , respectively. We set  $k = 30$ .

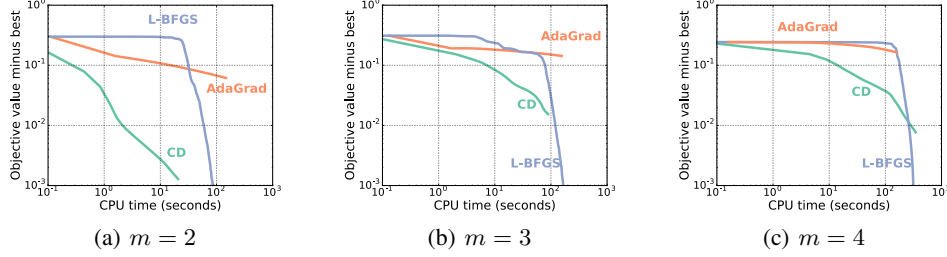

Figure 3: Solver comparison for minimizing (10) on the GD dataset. We set  $\beta$  to the values with best test-set performance, which were  $\beta = 0.01$ ,  $\beta = 0.01$  and  $\beta = 0.0001$ , respectively. We set  $k = 30$ .

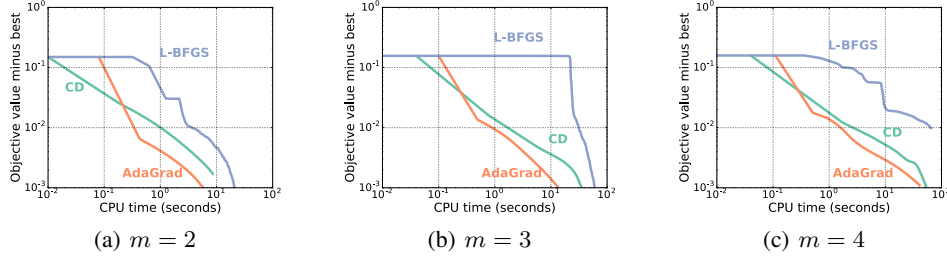

Figure 4: Solver comparison for minimizing (10) on the Movielens 100K dataset. We set  $\beta$  to the values with best test-set performance, which were  $\beta = 10^{-3}$ ,  $\beta = 10^{-4}$  and  $\beta = 10^{-6}$ , respectively. We set  $k = 30$ .

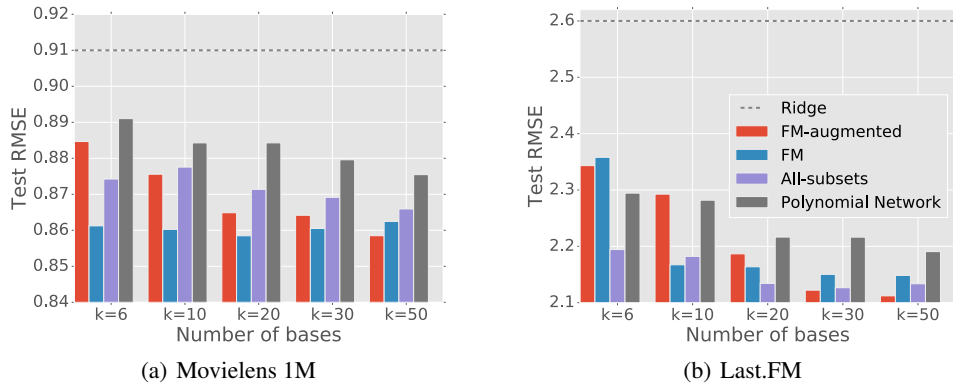

Figure 5: Model comparison on two recommender system datasets.

## C Reverse-mode differentiation on the alternative recursion

We now describe how to apply reverse-mode differentiation to the alternative recursion (11) in order to compute the entire gradient efficiently. Let us introduce the shorthands  $a_t := \mathcal{A}^t(\mathbf{p}, \mathbf{x})$  and  $d_t := \mathcal{D}^t(\mathbf{p}, \mathbf{x})$ . We can then write the recursion as

$$a_m = \frac{1}{m} \sum_{t=1}^m (-1)^{t+1} a_{m-t} d_t.$$

For concreteness, let us illustrate the recursion for  $m = 3$ . We have

$$a_1 = a_0 d_1, \quad a_2 = \frac{1}{2}(a_1 d_1 - a_0 d_2) \quad \text{and} \quad a_3 = \frac{1}{3}(a_2 d_1 - a_1 d_2 + a_0 d_3).$$

We see that  $a_2$  influences  $a_3$ , and  $a_1$  influences  $a_2$  and  $a_3$ . Likewise,  $d_3$  influences  $a_3$ ,  $d_2$  influences  $a_2$  and  $a_3$ , and  $d_1$  influences  $a_1$ ,  $a_2$  and  $a_3$ . Let us denote the adjoints  $\tilde{a}_t := \frac{\partial a_m}{\partial a_t}$  and  $\tilde{d}_t := \frac{\partial a_m}{\partial d_t}$ . For general  $m$ , summing over quantities that influences  $a_t$  and  $d_t$ , we obtain

$$\tilde{a}_t = \sum_{s=t+1}^m \frac{(-1)^{s-t+1}}{s} \tilde{a}_s d_{s-t} \quad \text{and} \quad \tilde{d}_t = (-1)^{t+1} \sum_{s=t}^m \frac{1}{s} \tilde{a}_s a_{s-t}.$$

Let us denote the adjoint of  $p_j$  by  $\tilde{p}_j := \frac{\partial a_m}{\partial p_j}$ . We know that  $p_j$  directly influences only  $d_1, \dots, d_m$  and therefore

$$\tilde{p}_j = \sum_{t=1}^m \frac{\partial a_m}{\partial d_m} \frac{\partial d_m}{\partial p_j} = \sum_{t=1}^m \tilde{d}_t t p_j^{t-1} x_j^t.$$

Assuming that  $d_1, \dots, d_m$  and  $a_1, \dots, a_m$  have been previously computed, which takes  $O(dm + m^2)$ , the procedure for computing the gradient can be summarized as follows:

1. Initialize  $\tilde{a}_m = 1$ ,
2. Compute  $\tilde{a}_{m-1}, \dots, \tilde{a}_1$  (in that order),
3. Compute  $\tilde{d}_m, \dots, \tilde{d}_1$ ,
4. Compute  $\nabla \mathcal{A}^m(\mathbf{p}, \mathbf{x}) = [\tilde{p}_1, \dots, \tilde{p}_d]^T$ .

Steps 2 and 4 both take  $O(m^2)$  and step 4 takes  $O(dm)$  so the total cost is  $O(dm + m^2)$ . We can improve the complexity of step 4 as follows. We can rewrite  $\nabla \mathcal{A}^m(\mathbf{p}, \mathbf{x})$  in matrix notation:

$$\nabla \mathcal{A}^m(\mathbf{p}, \mathbf{x}) = \left( \begin{bmatrix} 1 & p_1 x_1 & (p_1 x_1)^2 & \dots & (p_1 x_1)^{m-1} \\ 1 & p_2 x_2 & (p_2 x_2)^2 & \dots & (p_2 x_2)^{m-1} \\ \vdots & \vdots & \vdots & \ddots & \vdots \\ 1 & p_d x_d & (p_d x_d)^2 & \dots & (p_d x_d)^{m-1} \end{bmatrix} \begin{bmatrix} \tilde{d}_1 \\ 2\tilde{d}_2 \\ \vdots \\ m\tilde{d}_m \end{bmatrix} \right) \circ \mathbf{x}.$$

The left matrix is called a Vandermonde matrix. The product between a  $d \times m$  Vandermonde matrix and a  $m$ -dimensional vector can be computed using the Moenck-Borodin algorithm (an algorithm similar to the FFT), in  $O(r \log^2 l)$ , where  $r = \max(d, m)$  and  $l = \min(d, m)$  [11]. Since  $m \leq d$ , the cost of step 4 can therefore be reduced to  $O(d \log^2 m)$ .
